# Supplementary material for: Quantitative proteomics reveal the anti-tumour mechanism of the carbohydrate recognition domain of Galectin-3 in Hepatocellular carcinoma
Source: PubMed Central journal article supplement (PMC5507876; doi:10.1038/s41598-017-05419-5), 2017-07-12
Supplement: 41598_2017_5419_MOESM1_ESM.pdf [file 41598_2017_5419_MOESM1_ESM.pdf]

**Quantitative proteomics reveal the anti-tumour mechanism of the carbohydrate recognition domain of Galectin-3 in Hepatocellular carcinoma**

Mingchao Wang, Fang Tian, Wantao Ying\*, Xiaohong Qian\*

Correspondence to: QIAN Xiao hong, Email: qianxh1@163.com. YING Wan tao, Email: proteomics@126.com

**Affiliations:**

Beijing Institute of Radiation Medicine, National Center for Protein Sciences Beijing, State Key Laboratory of Proteomics, Beijing Proteome Research Center, Beijing, China

**Tel/Fax:** +86-10-80705055; +86-10-80705155

**Running title:** Anti-tumor mechanism revealed by quantitative proteomics

**Key words:** Hepatocellular carcinoma, Quantitative proteomics, Gal3C

A

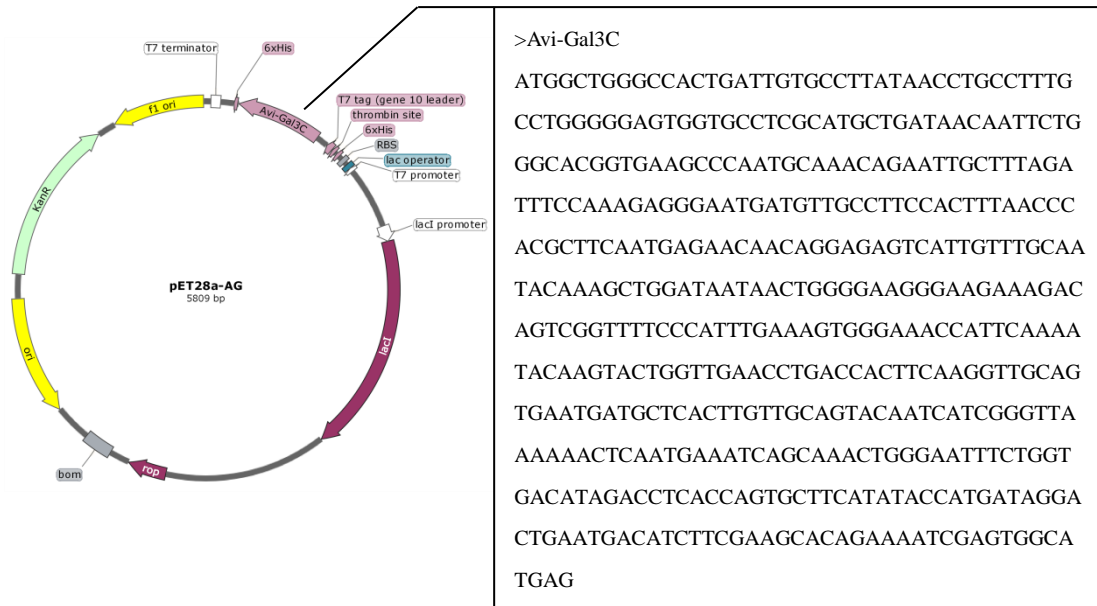

B

>Sequencing result of Avi-Gal3C

ATGGGCAGCAGCCATCATCATCATCACAGCAGCGGCCTGGTGCCGCGCGGCAGCCATATGGCTAGCATGACT  
 GGTGGACAGCAAATGGGTCGCGGATCCGAATTCATGGCTGGGCCACTGATTGTGCCTTATAACCTGCCTTTGCCTG  
 GGGGAGTGGTGCCTCGCATGCTGATAACAATTCTGGGCACGGTGAAGCCAATGCAAACAGAATTGCTTTAGATT  
 TCCAAAGAGGGAATGATGTTGCCTTCCACTTTAACCCACGCTTCAATGAGAACAACAGGAGAGTCATTGTTTGCAA  
 TACAAAGCTGGATAATAACTGGGGAAGGGAAGAAAGACAGTCGGTTTTCCATTTGAAAGTGGGAAACCATTCAA  
 AATACAAGTACTGGTTGAACCTGACCATTCAAGGTTGCAGTGAATGATGCTCACTTGTTCAGTACAATCATCGG  
 GTTAAAAAACTCAATGAAATCAGCAAACCTGGGAATTTCTGGTGACATAGACCTCACCAGTGCTTCATATACCATGA  
 TAGGACTGAATGACATCTTCGAAGCACAGAAAATCGAGTGGCATGAGCTCGAGCACCACCACCACCACCTGTA

C

>rGal3C

MGSSHHHHHHSSGLVPRGSHMASMTGGQMQMRGSEFMAGPLIVPYNLPLPGGVVPRMLITILGTVKPNANRIALDFQR  
 GNDVAFHFNPRFNENNRRVIVCNKLDNNWGREERQSVFPFESGKPFKIQVLEVPDHFQVAVNDAHLLQYNHRVKKL  
 NEISKLGISGDIDLTSASYTMIGLNDIFEAQKIEWHELEHHHHHH

Supplementary Figure S1. Information of pET28a-AG and rGal3C. (A) Plasmid pET28a-AG was synthesized by inserting the 468 bp Avi-Gal3C DNA fragment into plasmid pET28a. (B) Nucleotide sequencing results of the inserted DNA fragment (Avi-Gal3C), the DNA fragment encoding carbohydrate recognize domain of Galectin-3 was underlined. (C) Amino acid sequence of rGal3C. The first 36 amine acids were the N-terminal histone tag (HisHisHisHisHisHis) and T7 tag (MetAlaSerMetThrGlyGlyGlnGlnMetGly), and underlined amine acids from 37-177 were the core sequence of carbohydrate recognition domain of galectin-3, and amine acids from 178-200 were the avi-tag (GlyLeuAsnAspIlePheGluAlaGlnLysIleClu) and C-terminal histone tag (HisHisHisHisHisHis).

## IPAMTIAK

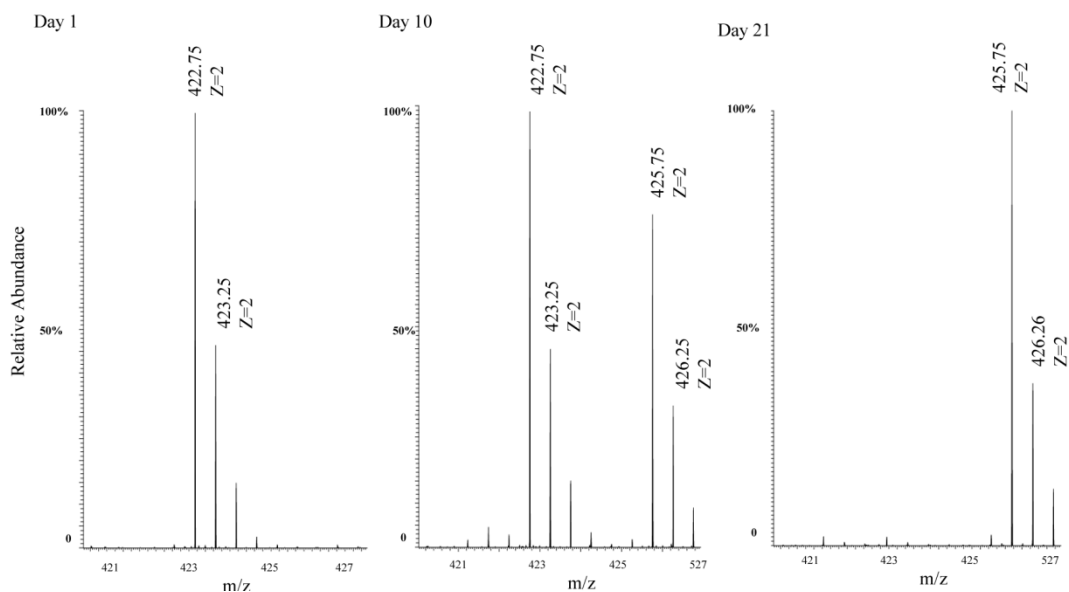

## LLSELDQQSTEMPR

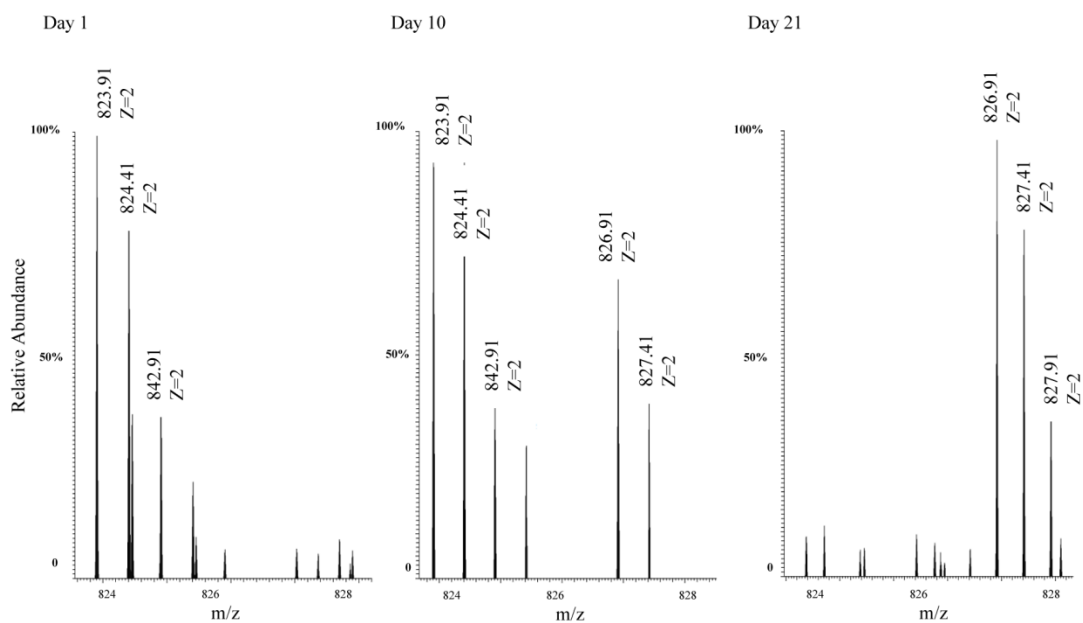

Supplementary Figure S2. Incorporation of  $^{13}\text{C}_6$ -L-lysine and  $^{13}\text{C}_6$ -L-arginine into HepG2 at various time points. The peptide IPAMTIAK ( $M_r=843.49$ ) has a charge state of 2 and contains one lysine, the peptide LLSELDQQSTEMPR ( $M_r=1645.84$ ) has a charge state of 2 and contains one arginine, and their heavy isotope is 6.032 Da higher than the light isotope. The ratio of intensity of heavy to light peak steadily increased. On day 21, this peptide was fully incorporated with  $^{13}\text{C}_6$ -L-lysine or  $^{13}\text{C}_6$ -L-arginine.

A

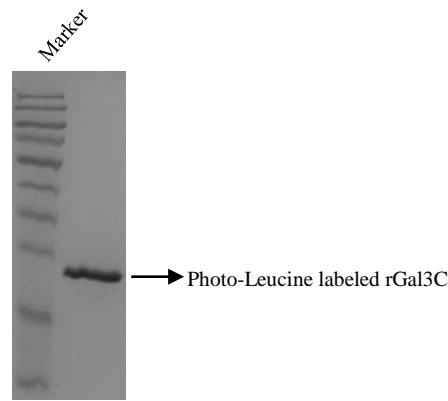

B

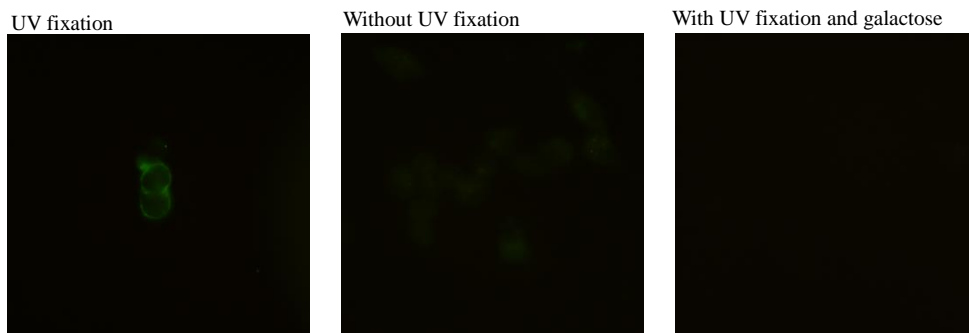

C

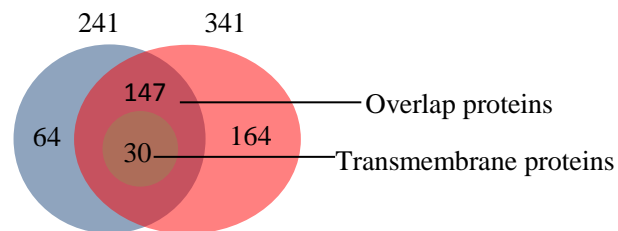

D

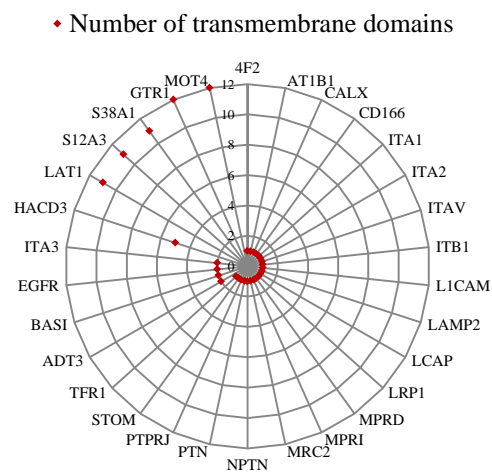

Supplementary Figure S3. (A) The Photo-Leucine labeled rGal3C was detected by 12% SDS-PAGE. (B) The binding of Photo-Leucine labeled rGal3C to HepG2 cell surface with UV fixation, without UV fixation or with UV fixation in the presence of lactose. (C) Overall 241 and 341 proteins were identified in two independent repeated experiments respectively, and 177 were repeated identified. In the 177 overlap proteins, 30 transmembrane proteins analyzed by TMHMM

Server v2.0 were considered as potential receptors of rGal3C. (D) A radar map displayed the number of transmembrane domains of the 30 potential receptors of rGal3C.

Supplementary table S1 List of up-regulated proteins

| Protein IDs | Gene names | unique peptide number |     | SILAC ratio |      |
|-------------|------------|-----------------------|-----|-------------|------|
|             |            | H/L                   | L/H | H/L         | L/H  |
| P09455      | RBP1       | 1                     | 2   | 5.46        | 3.23 |
| Q9UJX2      | CDC23      | 3                     | 1   | 1.31        | 3.05 |
| P31949      | S100A11    | 2                     | 2   | 5.16        | 2.43 |
| Q9NX74      | DUS2       | 2                     | 1   | 1.08        | 2.30 |
| O95470      | SGPL1      | 9                     | 10  | 1.13        | 2.05 |
| Q6PUV4      | CPLX2      | 4                     | 2   | 2.93        | 2.05 |
| Q14764      | MVP        | 8                     | 5   | 2.54        | 2.03 |
| P37802      | TAGLN2     | 3                     | 2   | 1.78        | 1.97 |
| O75746      | SLC25A12   | 3                     | 2   | 1.03        | 1.87 |
| Q9BQL6      | FERMT1     | 2                     | 3   | 1.72        | 1.86 |
| P09382      | LGALS1     | 4                     | 4   | 2.87        | 1.85 |
| P15559      | NQO1       | 8                     | 9   | 1.29        | 1.84 |
| Q56P03      | EAPP       | 1                     | 2   | 1.01        | 1.81 |
| P01011      | SERPINA3   | 6                     | 6   | 3.21        | 1.81 |
| P52943      | CRIP2      | 3                     | 2   | 1.47        | 1.79 |
| O43301      | HSPA12A    | 2                     | 2   | 1.78        | 1.77 |
| Q92887      | ABCC2      | 10                    | 9   | 1.01        | 1.76 |
| Q9Y3A2      | UTP11L     | 3                     | 2   | 1.01        | 1.76 |
| P38571      | LIPA       | 3                     | 6   | 1.11        | 1.74 |
| P31947      | SFN        | 8                     | 7   | 1.45        | 1.72 |
| P53634      | CTSC       | 7                     | 6   | 1.12        | 1.68 |
| Q14914      | PTGR1      | 4                     | 4   | 1.07        | 1.68 |
| O14908      | GIPC1      | 2                     | 2   | 1.07        | 1.66 |
| Q8N1I0      | DOCK4      | 3                     | 2   | 1.04        | 1.65 |
| P56747      | CLDN6      | 1                     | 3   | 2.08        | 1.63 |
| Q9UGH3      | SLC23A2    | 1                     | 1   | 1.23        | 1.63 |
| P10644      | PRKAR1A    | 9                     | 8   | 1.13        | 1.61 |
| O60443      | DFNA5      | 6                     | 5   | 1.10        | 1.59 |
| Q99519      | NEU1       | 4                     | 3   | 1.91        | 1.54 |
| O75312      | ZPR1       | 5                     | 3   | 1.06        | 1.54 |
| Q8IYU8      | MICU2      | 5                     | 3   | 1.19        | 1.53 |
| Q00653      | NFKB2      | 3                     | 3   | 1.19        | 1.53 |
| P06280      | GLA        | 2                     | 3   | 1.03        | 1.53 |
| P36955      | SERPINF1   | 5                     | 7   | 1.19        | 1.52 |
| P48506      | GCLC       | 10                    | 12  | 1.14        | 1.51 |
| O60678      | PRMT3      | 2                     | 3   | 1.21        | 1.51 |
| Q13509      | TUBB3      | 4                     | 4   | 2.01        | 1.46 |
| P13284      | IFI30      | 2                     | 2   | 1.78        | 1.44 |

|               |          |    |    |      |      |
|---------------|----------|----|----|------|------|
| <b>P00966</b> | ASS1     | 10 | 11 | 1.71 | 1.39 |
| <b>P60981</b> | DSTN     | 7  | 9  | 1.50 | 1.38 |
| <b>P01009</b> | SERPINA1 | 17 | 17 | 1.54 | 1.35 |
| <b>O60218</b> | AKR1B10  | 16 | 16 | 2.31 | 1.33 |
| <b>Q16658</b> | FSCN1    | 12 | 12 | 2.02 | 1.31 |
| <b>P23368</b> | ME2      | 3  | 2  | 1.56 | 1.29 |
| <b>P04792</b> | HSPB1    | 5  | 2  | 2.56 | 1.23 |
| <b>Q16643</b> | DBN1     | 6  | 6  | 1.72 | 1.20 |
| <b>Q13501</b> | SQSTM1   | 6  | 2  | 2.59 | 1.18 |
| <b>P21333</b> | FLNA     | 66 | 67 | 1.54 | 1.16 |
| <b>Q01995</b> | TAGLN    | 9  | 6  | 5.26 | 1.15 |
| <b>Q9NR12</b> | PDLIM7   | 6  | 4  | 1.73 | 1.15 |
| <b>Q99536</b> | VAT1     | 10 | 12 | 1.57 | 1.15 |
| <b>Q9NRZ9</b> | HELLS    | 5  | 8  | 1.53 | 1.15 |
| <b>Q14807</b> | KIF22    | 4  | 5  | 1.56 | 1.14 |
| <b>Q8IYB7</b> | DIS3L2   | 3  | 4  | 1.57 | 1.14 |
| <b>P01034</b> | CST3     | 3  | 2  | 1.55 | 1.13 |
| <b>Q16881</b> | TXNRD1   | 12 | 14 | 1.79 | 1.13 |
| <b>P67936</b> | TPM4     | 5  | 4  | 1.50 | 1.12 |
| <b>Q9HC07</b> | TMEM165  | 2  | 2  | 1.68 | 1.11 |
| <b>Q7Z406</b> | MYH14    | 3  | 2  | 1.83 | 1.10 |
| <b>P51948</b> | MNAT1    | 1  | 1  | 1.67 | 1.10 |
| <b>P52292</b> | KPNA2    | 6  | 6  | 1.85 | 1.10 |
| <b>Q5TFE4</b> | NT5DC1   | 8  | 8  | 1.69 | 1.10 |
| <b>P78504</b> | JAG1     | 3  | 2  | 1.68 | 1.09 |
| <b>P46821</b> | MAP1B    | 3  | 3  | 1.93 | 1.09 |
| <b>Q9UK76</b> | HN1      | 2  | 1  | 1.77 | 1.08 |
| <b>P42575</b> | CASP2    | 2  | 1  | 1.53 | 1.07 |
| <b>P35579</b> | MYH9     | 44 | 33 | 1.91 | 1.06 |
| <b>P02794</b> | FTH1     | 3  | 2  | 1.91 | 1.05 |
| <b>Q9H0A8</b> | COMMD4   | 6  | 2  | 1.52 | 1.05 |
| <b>Q01664</b> | TFAP4    | 1  | 2  | 1.68 | 1.04 |
| <b>Q9UPY5</b> | SLC7A11  | 1  | 2  | 2.47 | 1.04 |
| <b>Q9ULT8</b> | HECTD1   | 11 | 3  | 1.63 | 1.03 |
| <b>P04035</b> | HMGCR    | 6  | 2  | 2.50 | 1.03 |
| <b>O14530</b> | TXNDC9   | 4  | 4  | 1.50 | 1.02 |
| <b>Q9Y371</b> | SH3GLB1  | 6  | 2  | 1.70 | 1.01 |
| <b>P31153</b> | MAT2A    | 5  | 2  | 1.60 | 1.01 |
| <b>P06400</b> | RB1      | 5  | 3  | 1.58 | 1.01 |
| <b>P46013</b> | MKI67    | 17 | 15 | 1.63 | 1.00 |
| <b>Q99439</b> | CNN2     | 7  | 6  | 1.74 | 1.00 |

Supplementary Table S2 List of down-regulated proteins

| Protein IDs   | Gene names    | unique peptide number |     | SILAC ratio |      |
|---------------|---------------|-----------------------|-----|-------------|------|
|               |               | H/L                   | L/H | H/L         | L/H  |
| <b>Q08AH3</b> | ACSM2A        | 2                     | 3   | 0.55        | 0.22 |
| <b>Q92597</b> | NDRG1         | 9                     | 9   | 0.37        | 0.38 |
| <b>P10909</b> | CLU           | 11                    | 6   | 0.29        | 0.53 |
| <b>P48029</b> | SLC6A8        | 3                     | 3   | 0.71        | 0.25 |
| <b>P37059</b> | HSD17B2       | 5                     | 6   | 0.86        | 0.21 |
| <b>P08833</b> | IGFBP1        | 3                     | 4   | 0.58        | 0.32 |
| <b>P05121</b> | SERPINE1      | 9                     | 12  | 0.59        | 0.34 |
| <b>P0C7P0</b> | CISD3         | 1                     | 2   | 0.61        | 0.33 |
| <b>P23141</b> | CES1          | 26                    | 27  | 0.95        | 0.27 |
| <b>P08319</b> | ADH4          | 11                    | 9   | 0.62        | 0.43 |
| <b>P02671</b> | FGA           | 9                     | 8   | 0.42        | 0.64 |
| <b>Q06033</b> | ITIH3         | 6                     | 2   | 0.32        | 0.85 |
| <b>P35575</b> | G6PC          | 1                     | 1   | 0.30        | 0.94 |
| <b>P21549</b> | AGXT          | 9                     | 9   | 0.84        | 0.35 |
| <b>O00584</b> | RNASET2       | 7                     | 9   | 0.46        | 0.64 |
| <b>Q16877</b> | PFKFB4        | 5                     | 4   | 0.57        | 0.54 |
| <b>Q13740</b> | ALCAM         | 6                     | 7   | 0.74        | 0.41 |
| <b>Q02338</b> | BDH1          | 8                     | 7   | 0.50        | 0.63 |
| <b>P02787</b> | TF            | 30                    | 28  | 0.61        | 0.53 |
| <b>Q6UWM9</b> | UGT2A3        | 8                     | 6   | 0.67        | 0.48 |
| <b>Q4G0N4</b> | NADK2         | 6                     | 5   | 0.60        | 0.54 |
| <b>Q8N6C5</b> | IGSF1         | 14                    | 8   | 0.46        | 0.72 |
| <b>P55268</b> | LAMB2         | 6                     | 4   | 0.70        | 0.49 |
| <b>P13674</b> | P4HA1         | 15                    | 17  | 0.52        | 0.66 |
| <b>P07148</b> | FABP1         | 9                     | 8   | 0.61        | 0.58 |
| <b>Q9Y646</b> | CPQ           | 4                     | 3   | 0.63        | 0.57 |
| <b>P52569</b> | SLC7A2;SLC7A1 | 2                     | 1   | 0.67        | 0.55 |
| <b>P56181</b> | NDUFV3        | 1                     | 1   | 0.43        | 0.88 |
| <b>P10646</b> | TFPI          | 6                     | 6   | 0.58        | 0.65 |
| <b>Q9C0E8</b> | LNP           | 7                     | 4   | 0.60        | 0.65 |
| <b>Q8TEQ8</b> | PIGO          | 2                     | 1   | 0.50        | 0.77 |
| <b>P51687</b> | SUOX          | 2                     | 1   | 0.74        | 0.54 |
| <b>P09972</b> | ALDOC         | 9                     | 10  | 0.64        | 0.62 |
| <b>Q9BQE5</b> | APOL2         | 4                     | 5   | 0.82        | 0.49 |
| <b>Q93088</b> | BHMT          | 6                     | 5   | 0.48        | 0.84 |
| <b>Q9UDR5</b> | AASS          | 15                    | 8   | 0.70        | 0.58 |
| <b>Q2QL34</b> | MPV17L        | 2                     | 2   | 0.73        | 0.56 |
| <b>Q02252</b> | ALDH6A1       | 16                    | 16  | 0.62        | 0.66 |
| <b>Q969G6</b> | RFK           | 2                     | 1   | 0.70        | 0.59 |
| <b>Q9UN36</b> | NDRG2         | 7                     | 5   | 0.63        | 0.66 |
| <b>Q96I45</b> | TMEM141       | 2                     | 1   | 0.64        | 0.66 |

|               |             |    |    |      |      |
|---------------|-------------|----|----|------|------|
| <b>Q9UBM7</b> | DHCR7       | 3  | 2  | 0.47 | 0.90 |
| <b>P16591</b> | FER         | 5  | 2  | 0.81 | 0.53 |
| <b>Q96EY8</b> | MMAB        | 4  | 3  | 0.61 | 0.71 |
| <b>Q96A26</b> | FAM162A     | 6  | 4  | 0.66 | 0.65 |
| <b>Q15120</b> | PDK3        | 1  | 1  | 0.60 | 0.73 |
| <b>Q8NBP7</b> | PCSK9       | 3  | 4  | 0.74 | 0.59 |
| <b>Q96HE7</b> | ERO1L       | 12 | 13 | 0.58 | 0.76 |
| <b>P08754</b> | GNAI3       | 2  | 3  | 0.46 | 0.97 |
| <b>P00450</b> | CP          | 8  | 5  | 0.75 | 0.60 |
| <b>P28332</b> | ADH6        | 9  | 10 | 0.65 | 0.69 |
| <b>Q16134</b> | ETFDH       | 8  | 6  | 0.76 | 0.59 |
| <b>Q9BY49</b> | PECR        | 11 | 12 | 0.55 | 0.83 |
| <b>P00734</b> | F2          | 9  | 4  | 0.49 | 0.93 |
| <b>P16662</b> | UGT2B7      | 4  | 5  | 0.95 | 0.48 |
| <b>P78549</b> | NTHL1       | 1  | 1  | 0.52 | 0.88 |
| <b>Q86WA6</b> | BPHL        | 8  | 6  | 0.54 | 0.86 |
| <b>Q16850</b> | CYP51A1     | 15 | 12 | 0.84 | 0.55 |
| <b>Q00577</b> | PURA        | 5  | 4  | 0.71 | 0.66 |
| <b>Q99424</b> | ACOX2       | 6  | 5  | 0.67 | 0.71 |
| <b>Q9BPW8</b> | NIPSNAP1    | 7  | 9  | 0.65 | 0.73 |
| <b>O00468</b> | AGRN        | 16 | 11 | 0.63 | 0.75 |
| <b>P39060</b> | COL18A1     | 6  | 6  | 0.74 | 0.65 |
| <b>O95479</b> | H6PD        | 7  | 4  | 0.63 | 0.77 |
| <b>Q16762</b> | TST         | 4  | 5  | 0.63 | 0.77 |
| <b>Q15118</b> | PDK1        | 2  | 1  | 0.96 | 0.51 |
| <b>P05204</b> | HMGN2;HMGN3 | 2  | 2  | 0.86 | 0.57 |
| <b>Q6JQN1</b> | ACAD10      | 2  | 2  | 0.55 | 0.88 |
| <b>O14638</b> | ENPP3       | 3  | 5  | 0.59 | 0.84 |
| <b>Q04446</b> | GBE1        | 9  | 11 | 0.65 | 0.77 |
| <b>Q8N4Z0</b> | RAB42       | 2  | 1  | 0.78 | 0.64 |
| <b>O00560</b> | SDCBP       | 1  | 5  | 0.53 | 0.94 |
| <b>P00387</b> | CYB5R3      | 8  | 7  | 0.62 | 0.81 |
| <b>Q9UKR5</b> | C14orf1     | 2  | 3  | 0.62 | 0.81 |
| <b>O00469</b> | PLOD2       | 16 | 18 | 0.60 | 0.85 |
| <b>Q96QD8</b> | SLC38A2     | 6  | 5  | 0.50 | 1.00 |
| <b>P02679</b> | FGG         | 13 | 14 | 0.63 | 0.80 |
| <b>Q969Z3</b> | MARC2       | 3  | 4  | 0.80 | 0.63 |
| <b>O95573</b> | ACSL3       | 17 | 18 | 0.89 | 0.57 |
| <b>P46019</b> | PHKA2       | 6  | 7  | 0.66 | 0.77 |
| <b>O75600</b> | GCAT        | 5  | 3  | 0.80 | 0.64 |
| <b>P31327</b> | CPS1        | 21 | 10 | 0.61 | 0.84 |
| <b>Q7Z3D6</b> | C14orf159   | 2  | 1  | 0.59 | 0.87 |
| <b>Q13011</b> | ECH1        | 10 | 8  | 0.65 | 0.79 |
| <b>Q9NR19</b> | ACSS2       | 13 | 11 | 0.81 | 0.65 |



|               |               |    |    |      |      |
|---------------|---------------|----|----|------|------|
| <b>P05026</b> | ATP1B1        | 9  | 8  | 0.66 | 0.81 |
| <b>Q9Y5U8</b> | MPC1          | 1  | 1  | 0.61 | 0.87 |
| <b>Q5T2W1</b> | PDZK1;PDZK1P1 | 9  | 8  | 0.57 | 0.94 |
| <b>P04080</b> | CSTB          | 6  | 5  | 0.89 | 0.60 |
| <b>P02771</b> | AFP           | 17 | 22 | 0.67 | 0.80 |
| <b>Q13825</b> | AUH           | 3  | 5  | 0.63 | 0.85 |
| <b>Q9H0W9</b> | C11orf54      | 6  | 9  | 0.58 | 0.93 |
| <b>P50453</b> | SERPINB9      | 11 | 7  | 0.92 | 0.58 |
| <b>Q9NPJ3</b> | ACOT13        | 3  | 4  | 0.64 | 0.85 |
| <b>Q15345</b> | LRRC41        | 2  | 4  | 0.66 | 0.83 |
| <b>Q53GQ0</b> | HSD17B12      | 12 | 14 | 0.59 | 0.93 |
| <b>P07305</b> | H1F0          | 7  | 6  | 0.63 | 0.89 |
| <b>Q9H6V9</b> | C2orf43       | 3  | 5  | 0.65 | 0.87 |
| <b>P61225</b> | RAP2B         | 2  | 1  | 0.65 | 0.87 |
| <b>P35914</b> | HMGCL         | 6  | 9  | 0.62 | 0.92 |
| <b>Q8N4T8</b> | CBR4          | 4  | 3  | 0.59 | 0.97 |
| <b>P53365</b> | ARFIP2        | 2  | 2  | 0.92 | 0.62 |
| <b>Q96BR5</b> | COA7          | 4  | 2  | 0.66 | 0.89 |
| <b>Q8TE04</b> | PANK1         | 1  | 3  | 0.93 | 0.63 |
| <b>Q008S8</b> | ECT2L         | 1  | 1  | 0.94 | 0.64 |
| <b>O00264</b> | PGRMC1        | 4  | 3  | 0.66 | 0.94 |
| <b>Q96AB3</b> | ISOC2         | 3  | 3  | 0.66 | 0.96 |
| <b>Q9P0M6</b> | H2AFY2        | 13 | 12 | 0.63 | 1.00 |
| <b>Q9H7C9</b> | AAMDC         | 3  | 5  | 0.67 | 0.97 |

Supplementary Table S3 List of potential receptors of rGal3C

| <b>Protein ID</b> | <b>Gene Name</b> | <b>Unique peptides_1</b> | <b>Unique peptides_2</b> | <b>iBAQ_1</b> | <b>iBAQ_2</b> |
|-------------------|------------------|--------------------------|--------------------------|---------------|---------------|
| <b>P08195</b>     | 4F2              | 13                       | 15                       | 51388000      | 102170000     |
| <b>P26006</b>     | ITA3             | 10                       | 12                       | 8734800       | 28183000      |
| <b>P56199</b>     | ITA1             | 5                        | 12                       | 2471600       | 8907500       |
| <b>Q01650</b>     | LAT1             | 4                        | 4                        | 27689000      | 31059000      |
| <b>P17301</b>     | ITA2             | 3                        | 4                        | 868750        | 3969000       |
| <b>P05026</b>     | AT1B1            | 2                        | 3                        | 1045300       | 28864000      |
| <b>P35613</b>     | BASI             | 2                        | 3                        | 9130800       | 20833000      |
| <b>P27824</b>     | CALX             | 2                        | 3                        | 979220        | 2728000       |
| <b>Q13740</b>     | CD166            | 2                        | 5                        | 816130        | 4586500       |
| <b>P00533</b>     | EGFR             | 2                        | 6                        | 1298000       | 5759300       |
| <b>P06756</b>     | ITAV             | 2                        | 5                        | 145470        | 2540000       |
| <b>P32004</b>     | L1CAM            | 2                        | 6                        | 423470        | 5865000       |
| <b>P13473</b>     | LAMP2            | 2                        | 2                        | 1830100       | 8407500       |
| <b>Q9UIQ6</b>     | LCAP             | 2                        | 1                        | 398200        | 322830        |
| <b>P02786</b>     | TFR1             | 2                        | 1                        | 352510        | 316730        |
| <b>P12236</b>     | ADT3             | 1                        | 1                        | 1446800       | 13671000      |
| <b>P11166</b>     | GTR1             | 1                        | 2                        | 2255600       | 3853300       |
| <b>Q9P035</b>     | HACD3            | 1                        | 2                        | 1331300       | 7679700       |
| <b>P05556</b>     | ITB1             | 1                        | 5                        | 0             | 11314000      |
| <b>Q07954</b>     | LRP1             | 1                        | 1                        | 53056         | 93367         |
| <b>O15427</b>     | MOT4             | 1                        | 1                        | 15661000      | 11441000      |
| <b>P20645</b>     | MPRD             | 1                        | 1                        | 1747600       | 2610500       |
| <b>P11717</b>     | MPRI             | 1                        | 8                        | 333210        | 1091100       |
| <b>Q9UBG0</b>     | MRC2             | 1                        | 1                        | 167160        | 888230        |
| <b>Q9Y639</b>     | NPTN             | 1                        | 2                        | 430810        | 2348500       |
| <b>P21246</b>     | PTN              | 1                        | 1                        | 1882300       | 25552000      |
| <b>Q12913</b>     | PTPRJ            | 1                        | 5                        | 427780        | 2018200       |
| <b>P55017</b>     | S12A3            | 1                        | 1                        | 301770        | 446250        |
| <b>Q9H2H9</b>     | S38A1            | 1                        | 2                        | 3849200       | 9622400       |
| <b>P27105</b>     | STOM             | 1                        | 3                        | 859220        | 6564700       |
